# Supplementary material for: Realizing semiconductor to metal transition in graphitic ZnO and MoS2 nanocomposite with external electric field
Source: Royal Society of Chemistry journal article supplement (doi:10.1039/c5ra18114c), 2015-01-01
Supplement: c5ra18114c1.pdf [file c5ra18114c1.pdf]

Supporting Information

**Realizing Semiconductor to Metal Transition in Graphitic ZnO  
and MoS<sub>2</sub> Nanocomposite with External Electric Field**

Weihua Wu,<sup>†</sup> Shaobin Tang,<sup>\*,†</sup> Junjing Gu<sup>‡</sup>, and Xinrui Cao<sup>§, ||</sup>

<sup>†</sup>Key Laboratory of Organo-Pharmaceutical Chemistry of Jiangxi Province, Gannan Normal University, Ganzhou 341000, China

<sup>‡</sup>State Key Laboratory of Physical Chemistry of Solid Surfaces and Fujian Provincial Key Laboratory of Theoretical and Computational Chemistry, College of Chemistry and Chemical Engineering, Xiamen University, Xiamen 361005, China

<sup>§</sup>Department of Theoretical Chemistry and Biology, School of Biotechnology, Royal Institute of Technology, S-106 91 Stockholm, Sweden

<sup>||</sup> Department of Physics and Institute of Theoretical Physics, Xiamen University, Xiamen 361005, China

\*Corresponding author e-mail: [tsb1980@xmu.edu.cn](mailto:tsb1980@xmu.edu.cn)

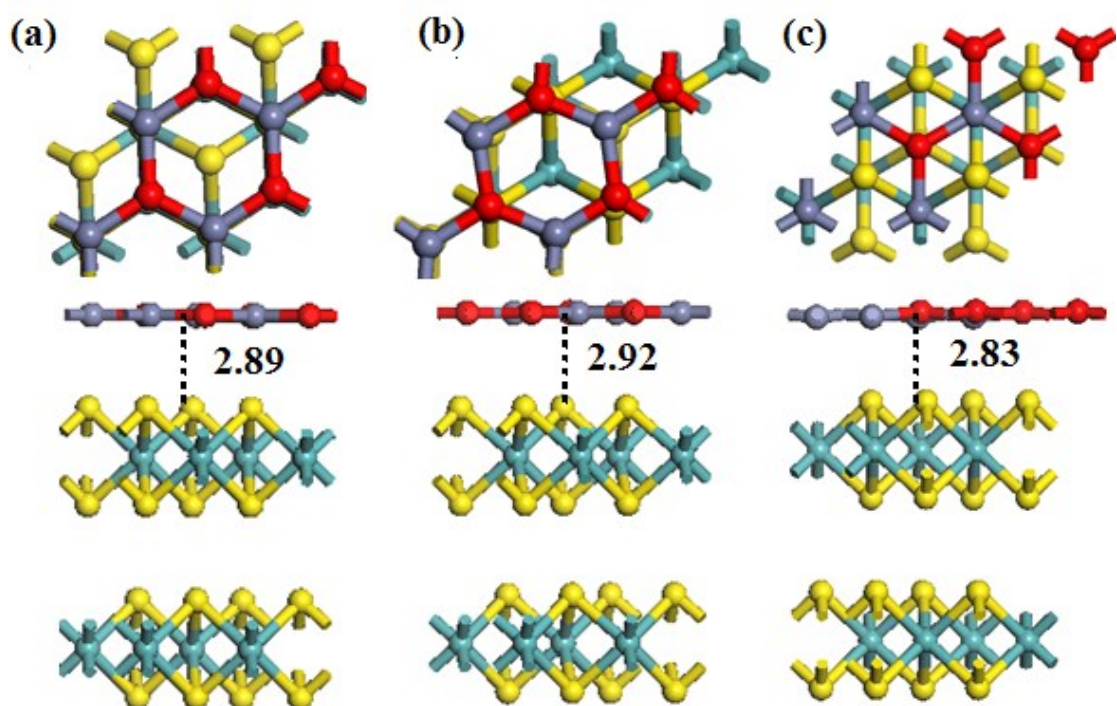

**Figure S1.** Top and side view of geometrical structures of g-ZnO/two-MoS<sub>2</sub> with (a) AA, (b) AB-Zn, and (c) AB-O stacking patterns. The distance is in Å.

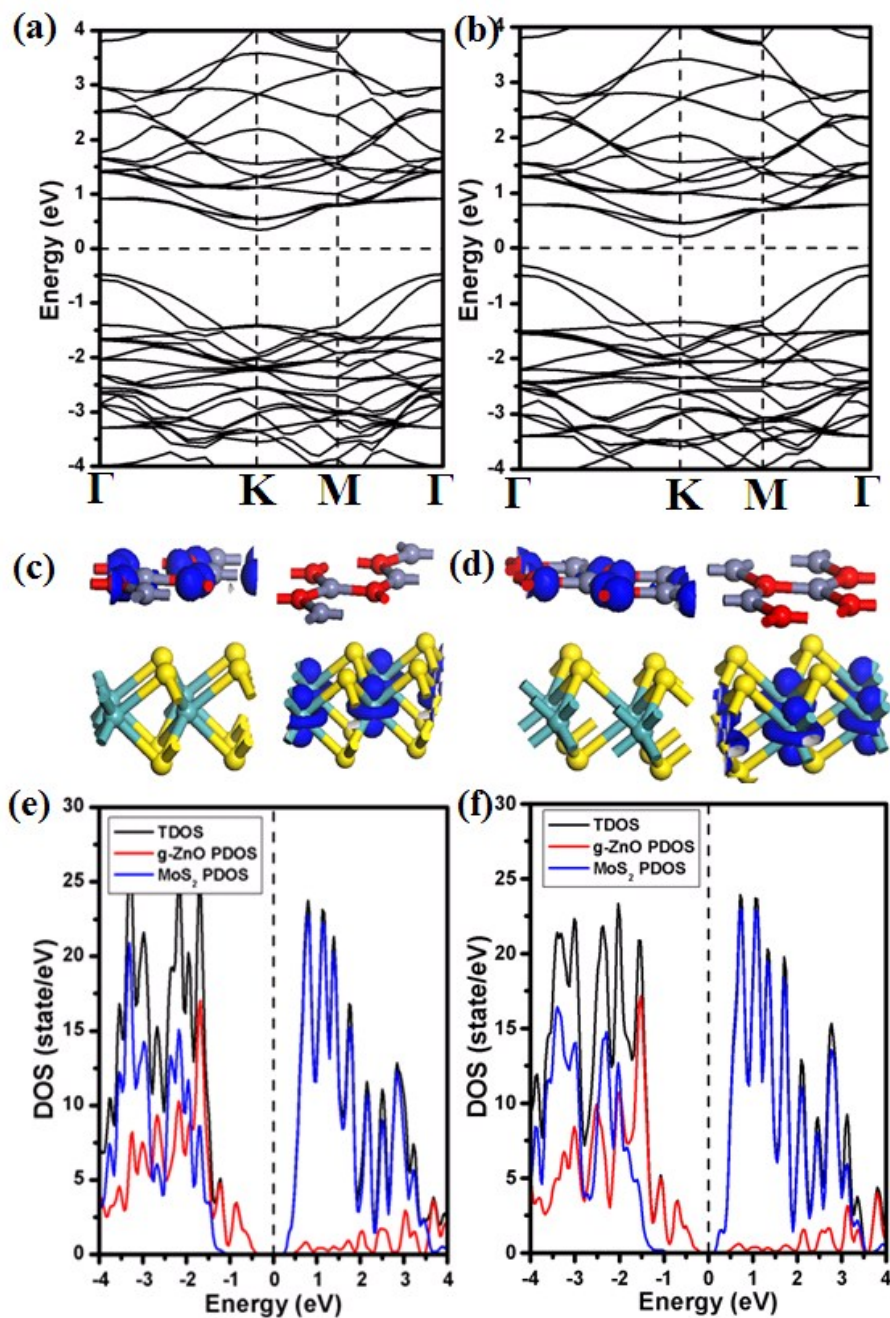

**Figure S2.** (a, b) Band structures, (c, d) partial charge densities of VBM (left panel) and CBM (right panel), and (e, f) TDOS and PDOS of g-ZnO and MoS<sub>2</sub> for g-ZnO/MoS<sub>2</sub> with (a), (c) and (e) AB-Zn-2, and (b), (d), and (f) AB-O-2 stacking patterns. The isosurfaces in (c, d) are  $0.04 e/\text{\AA}^3$ , and the Fermi level is set to 0.

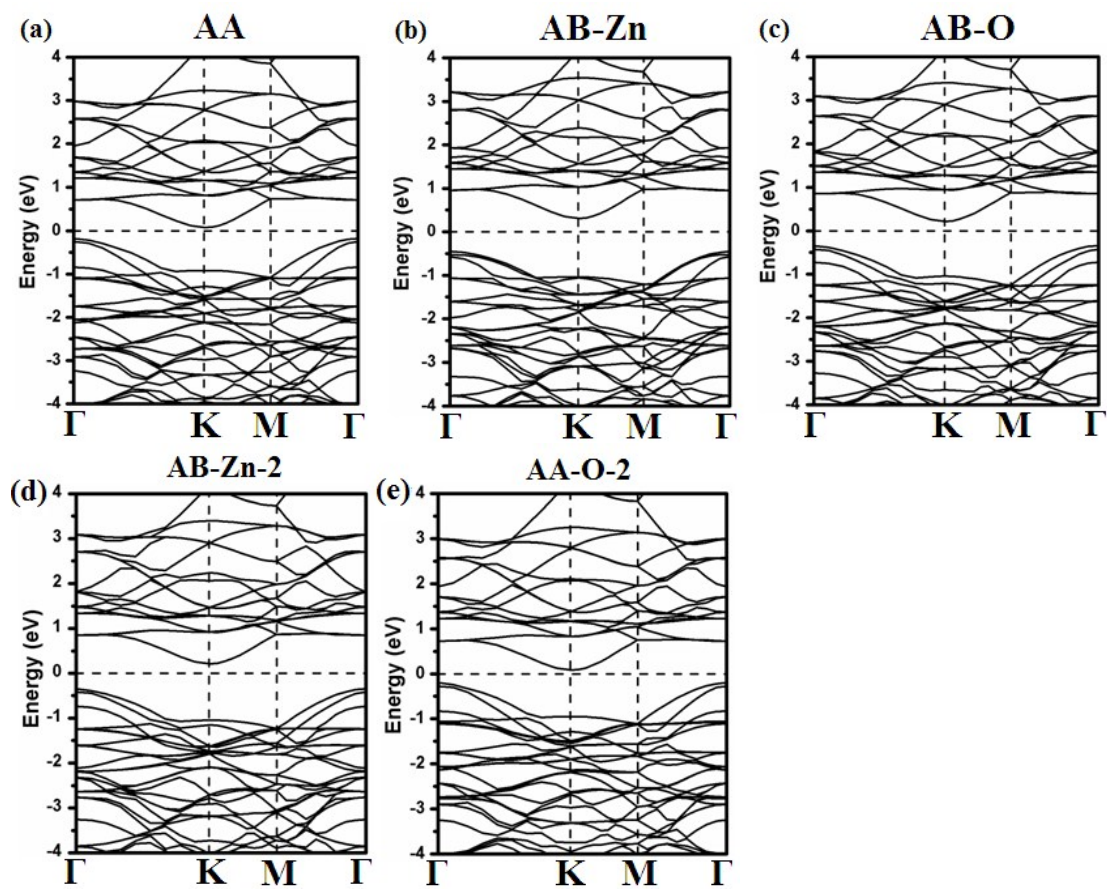

Figure S3. Band structures of g-ZnO/MoS<sub>2</sub> with lattice constant of isolated g-ZnO for different configurations. The Fermi level is set to 0.

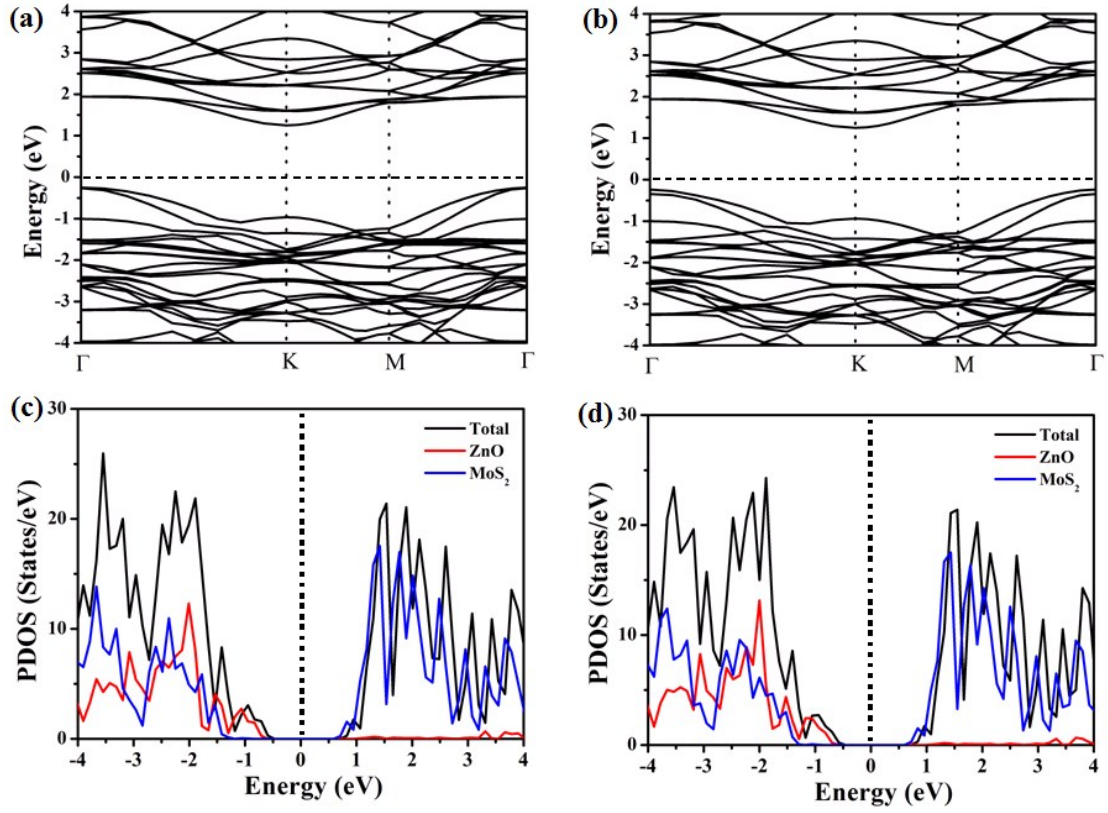

**Figure S4.** The band structures and PDOS of g-ZnO/MoS<sub>2</sub> by HSE06. (a) and (c) AA, and (b) and (d) AB-O-2 configurations. The Fermi level is set to 0.

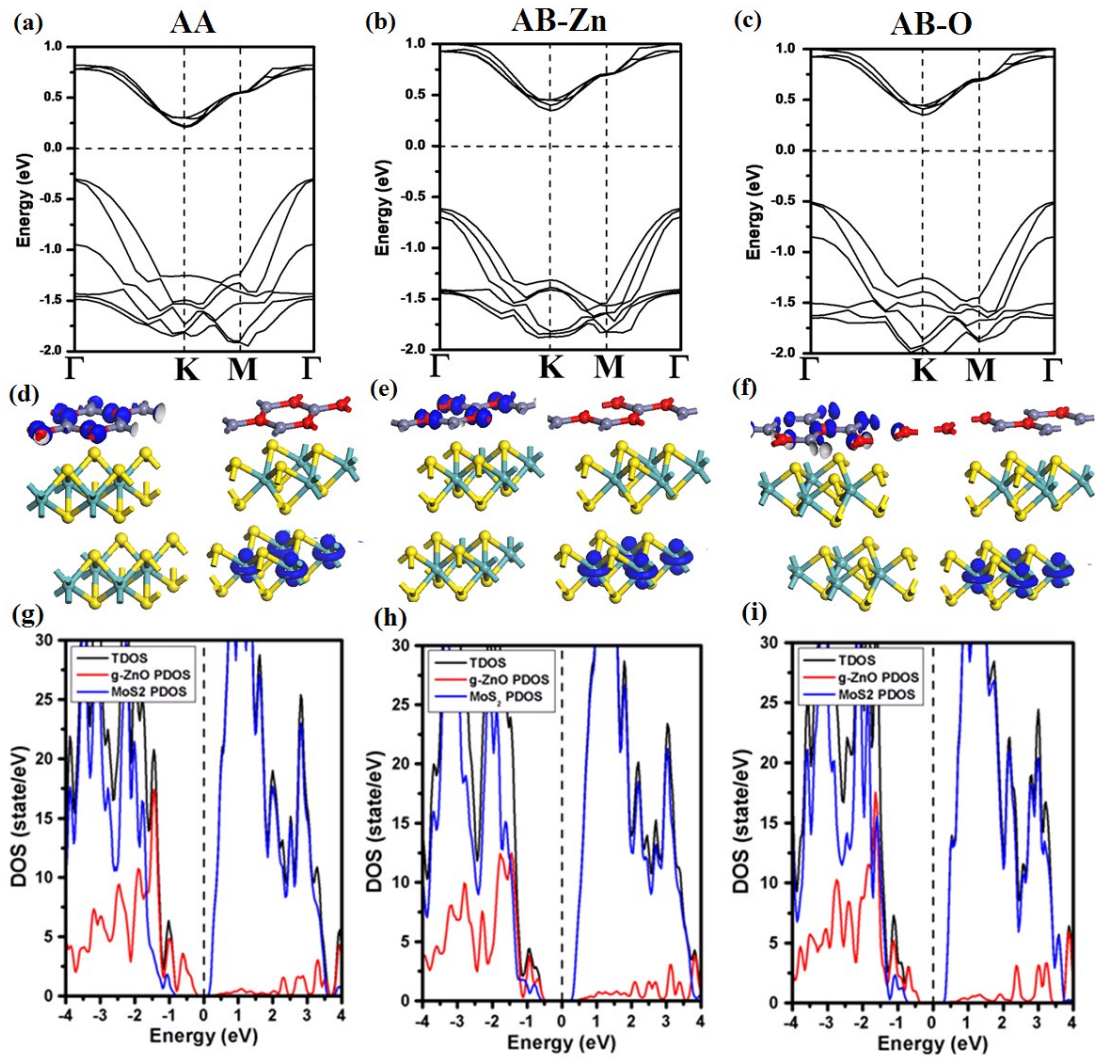

Figure S5. (a)-(c) Band structures, (d)-(f) partial charge densities of VBM (left panel) and CBM (right panel), and (g)-(i) TDOS and PDOS of g-ZnO and bilayer MoS<sub>2</sub> for g-ZnO/two-MoS<sub>2</sub> with (a), (d) and (g) AA, (b), (e), and (h) AB-Zn, (c), (f), and (i) AB-O stacking patterns. The isosurfaces in (d)-(f) are  $0.003 e/\text{\AA}^3$ , and the Fermi level is set to 0.

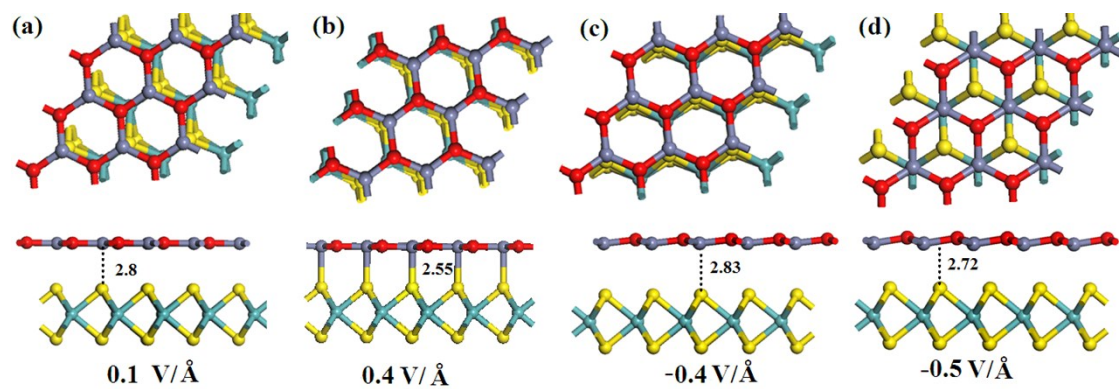

Figure S6. Top and side view of geometrical structures of g-ZnO/MoS<sub>2</sub> with initial AA configuration under the E-field with different strength. The distance is in Å.

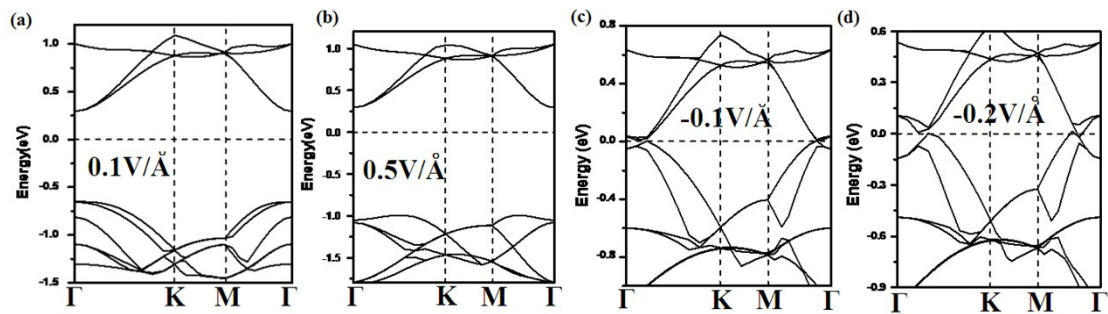

Figure S7. Band structures of g-ZnO/MoS<sub>2</sub> with initial AA stacking pattern under the external electric field with different strength. The Fermi level is set to 0.



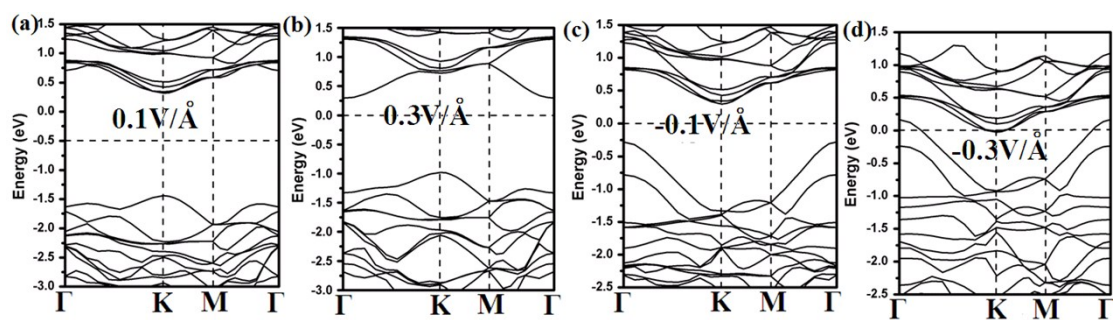

Figure S8. Band structures of g-ZnO/MoS<sub>2</sub> with lattice constant of isolated MoS<sub>2</sub> for AB-O stacking pattern under the external electric field with different strength. The Fermi level is set to 0.
